# Supplementary material
Source: publisher site journal article supplement (https://www.spandidos-publications.com/6273/downloadSupplementary)

Figure S1. Verification of transfection efficiency for overexpression of p53 and YTHDF1 in 293T cells. Reverse transcription-quantitative PCR and western blot analyses assessed p53 expression levels in 293T cells transfected with an empty vector or (A) pcDNA3.1-p53 and (B) pcDNA3.1-YTHDF1. \*\*\* $P < 0.001$ . YTHDF1, YTH N<sup>6</sup>-methyladenosine RNA binding protein 1; PCR, Polymerase Chain Reaction.

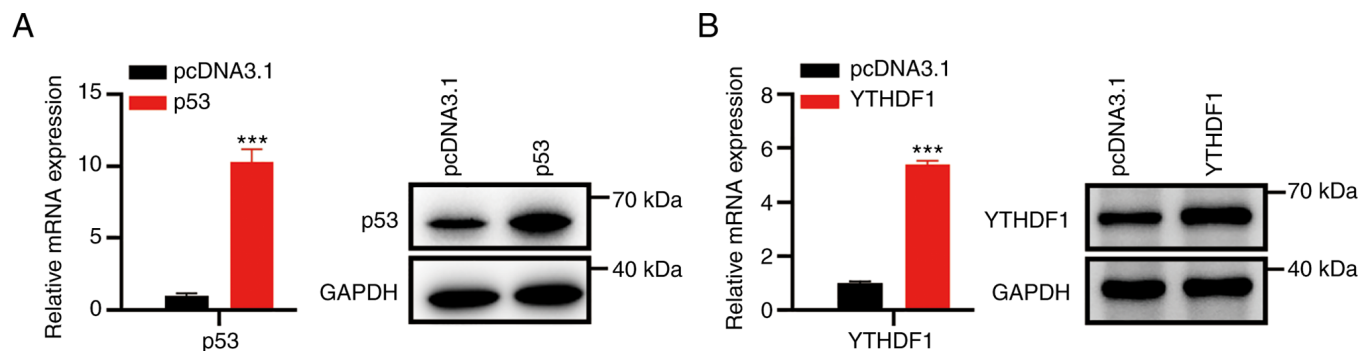

Supplement: Supplementary file 1 [file downloadSupplementary]
